# Supplementary material for: Characterisation of major histocompatibility complex class I genes in Japanese Ranidae frogs
Source: PubMed Central journal article supplement (PMC5056945; doi:10.1007/s00251-016-0934-x), 2016-07-14
Supplement: 251_2016_934_MOESM1_ESM.pdf [file 251_2016_934_MOESM1_ESM.pdf]

## Supplementary material

A. MHC class I variants identified in each individual and range of pairwise nucleotide (ncl) or amino acid (aa) difference within individual. Variants in bold were observed in more than one individual.

| Individual | <i>R. japonica</i>                                             |             |             | <i>R. ornativentris</i>                     |             |             | <i>R. tagoi</i>                       |             |             |
|------------|----------------------------------------------------------------|-------------|-------------|---------------------------------------------|-------------|-------------|---------------------------------------|-------------|-------------|
|            | Variants                                                       | ncl         | aa          | Variants                                    | ncl         | aa          | Variants                              | ncl         | aa          |
| 1          | <i>Raja</i> -UA* <b>01</b> , 07                                | 0.040       | 0.088       | <i>Raor</i> -UA*01, 02, 26                  | 0.044-0.063 | 0.081-0.116 | <i>Rata</i> -UA*01, 07, 08,<br>09     | 0.050-0.079 | 0.096-0.138 |
| 2          | <i>Raja</i> -UA* <b>01</b> , <b>03</b> , <b>05</b> , 08, 09    | 0.033-0.076 | 0.073-0.146 | <i>Raor</i> -UA* <b>06</b> , 07, 08, 09, 25 | 0.050-0.104 | 0.092-0.173 | <i>Rata</i> -UA*02, 03, 10            | 0.028-0.058 | 0.050-0.108 |
| 3          | <i>Raja</i> -UA* <b>01</b> , <b>03</b> , <b>05</b> , 10        | 0.038-0.076 | 0.077-0.146 | <i>Raor</i> -UA*16, 17, 22, 23, 24          | 0.044-0.077 | 0.081-0.119 | <i>Rata</i> -UA*17, 18, 22            | 0.043-0.058 | 0.088-0.104 |
| 4          | <i>Raja</i> -UA* <b>01</b> , 02, <b>03</b> , <b>04</b>         | 0.046-0.115 | 0.097-0.212 | <i>Raor</i> -UA* <b>06</b> , 14, 15, 27, 28 | 0.055-0.078 | 0.092-0.131 | <i>Rata</i> -UA*11, 12                | 0.050       | 0.100       |
| 5          | <i>Raja</i> -UA* <b>01</b> , <b>04</b> , <b>05</b>             | 0.047-0.065 | 0.112-0.131 | <i>Raor</i> -UA*13, 18, 19, 20, 21          | 0.045-0.069 | 0.088-0.138 | <i>Rata</i> -UA*13, 14                | 0.068       | 0.131       |
| 6          | <i>Raja</i> -UA* <b>04</b> , 06                                | 0.012       | 0.031       | <i>Raor</i> -UA*03, 04, 05                  | 0.058-0.065 | 0.096-0.108 | <i>Rata</i> -UA*04, 05, 06,<br>19, 20 | 0.053-0.101 | 0.100-0.169 |
| 7          | <i>Raja</i> -UA* <b>01</b> , <b>03</b> , <b>04</b> , <b>05</b> | 0.046-0.076 | 0.096-0.146 | <i>Raor</i> -UA*10, 11, 12                  | 0.058-0.076 | 0.108-0.150 | <i>Rata</i> -UA*15, 16, 21            | 0.060-0.072 | 0.104-0.131 |

B. Phylogenetic relationships between MHC class I sequences from *R. japonica* (black bar), *R. ornativentris* (white bar), and *R. t. tagoi* (grey bar) compared to other amphibians, using maximum likelihood method. Trees were constructed independently for (a)  $\alpha 1$  domain, (b)  $\alpha 2$  domain, and (c)  $\alpha 3$  domain. Shaded circles indicate nodes with bootstrap support > 70%. Inferred relationships are comparable to those determined by neighbour-joining method in Figure 2. The basal *Rana* clade (containing *Raja*-UA\*02, *Raor*-UA\*08 and *Rata*-UA\*04) is present in  $\alpha 2$  and  $\alpha 3$  trees. Accession numbers for sequences from other species listed in Figure 2.

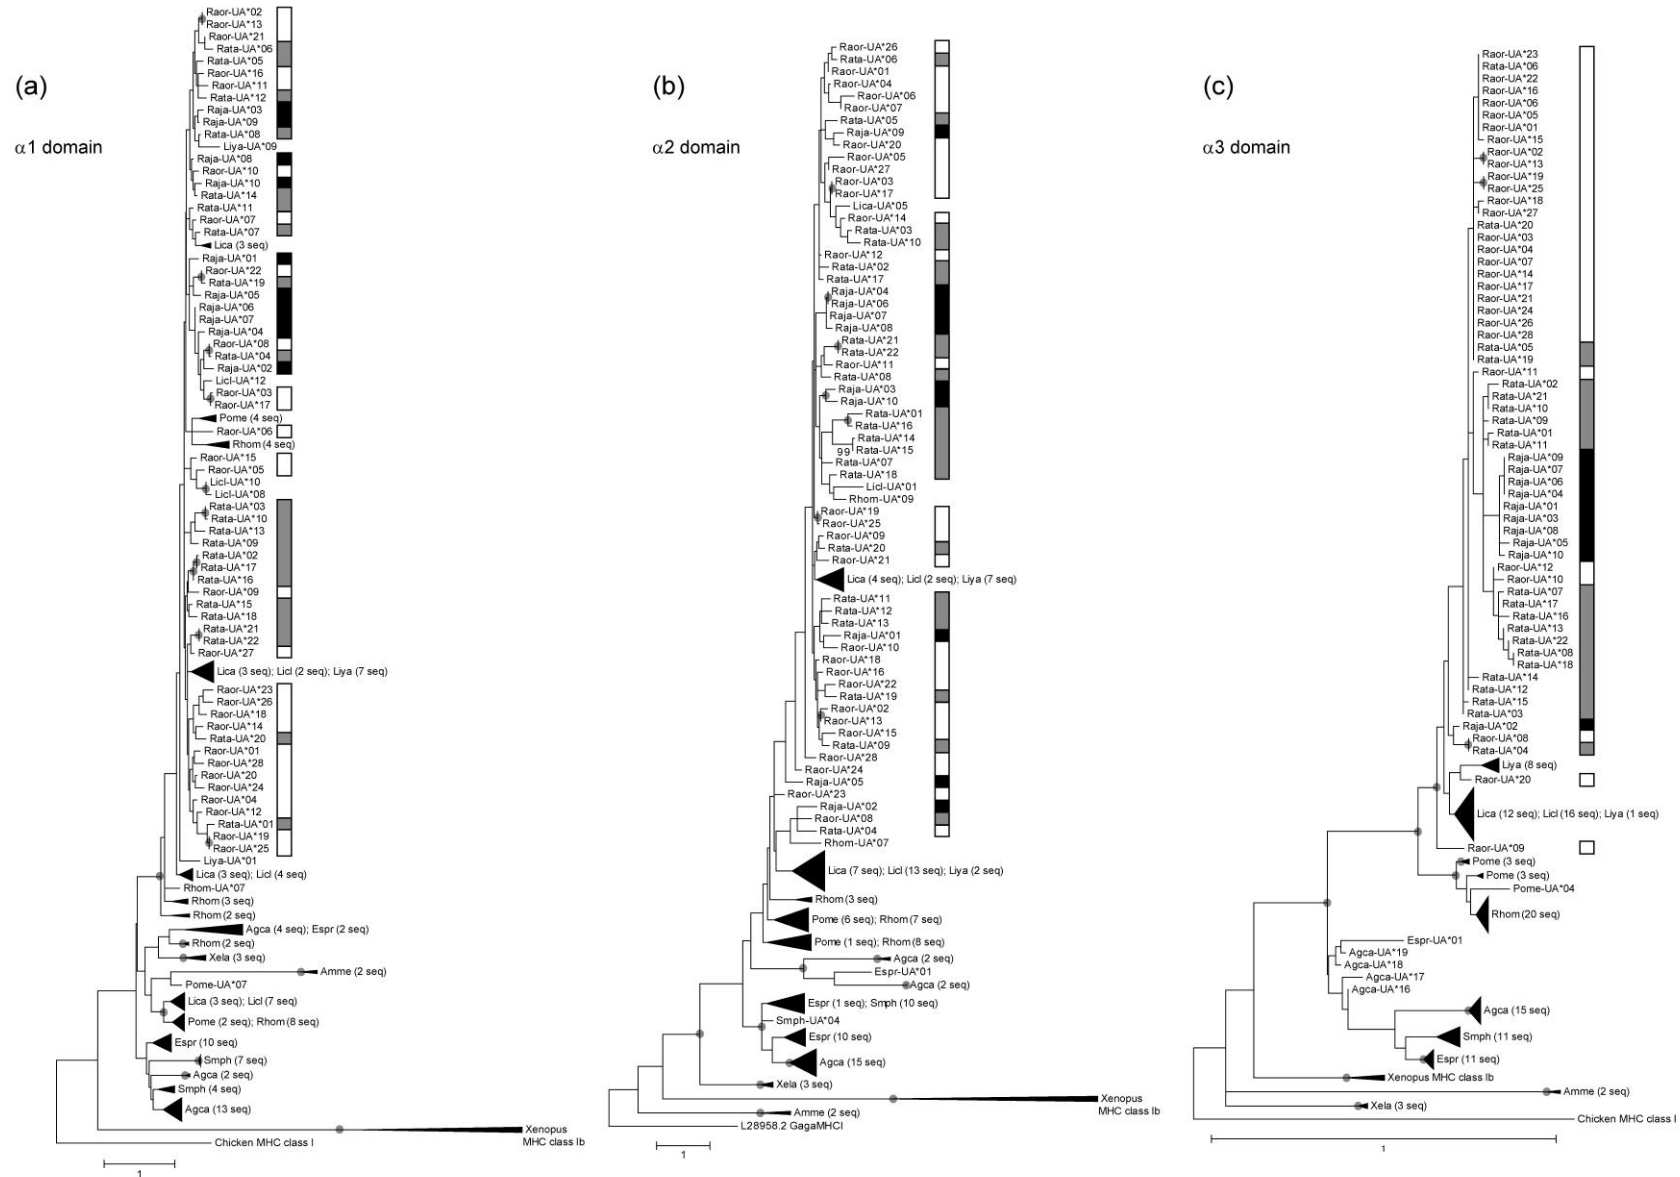

C. Codon sites predicted to be under positive selection in the three Japanese *Rana* species, as detected by each of the four methods omegaMap (OM), FEL, REL, and MEME.

| Site | <i>R. japonica</i> |     |     |      |       | <i>R. ornativentris</i> |     |     |      |       | <i>R. t. tagoi</i> |     |     |      |       |
|------|--------------------|-----|-----|------|-------|-------------------------|-----|-----|------|-------|--------------------|-----|-----|------|-------|
|      | OM                 | FEL | REL | MEME | Total | OM                      | FEL | REL | MEME | Total | OM                 | FEL | REL | MEME | Total |
| 5    | y                  |     | y   |      | 2     |                         | y   | y   | y    | 3     | y                  |     | y   |      | 2     |
| 6    |                    |     |     |      | 0     |                         |     |     |      | 0     | y                  |     |     |      | 1     |
| 9    | y                  |     | y   |      | 2     | y                       | y   | y   | y    | 4     | y                  | y   | y   |      | 4     |
| 11   | y                  | y   | y   |      | 3     | y                       | y   | y   | y    | 4     | y                  | y   | y   | y    | 4     |
| 15   | y                  |     |     |      | 1     |                         |     |     |      | 0     |                    |     |     |      | 0     |
| 22   |                    |     |     |      | 0     |                         | y   | y   |      | 2     |                    |     |     |      | 0     |
| 24   | y                  |     | y   | y    | 3     | y                       |     |     | y    | 2     | y                  |     | y   | y    | 3     |
| 25   |                    |     |     |      | 0     |                         |     |     |      | 0     | y                  |     |     |      | 1     |
| 28   |                    |     |     |      | 0     | y                       |     |     |      | 1     |                    |     |     |      | 0     |
| 31   |                    |     |     |      | 0     | y                       | y   | y   |      | 3     |                    |     |     |      | 0     |
| 34   | y                  | y   | y   |      | 3     | y                       | y   | y   | y    | 4     | y                  |     |     |      | 1     |
| 44   | y                  |     |     |      | 1     |                         |     |     |      | 0     |                    |     |     |      | 0     |
| 45   | y                  |     | y   |      | 2     | y                       |     |     |      | 1     | y                  |     |     |      | 1     |
| 49   | y                  |     |     |      | 1     |                         |     |     |      | 0     |                    |     |     |      | 0     |
| 62   | y                  |     |     |      | 1     | y                       |     |     |      | 1     | y                  |     |     | y    | 2     |
| 63   | y                  |     |     | y    | 2     | y                       | y   | y   | y    | 4     | y                  |     | y   | y    | 3     |
| 66   | y                  |     | y   |      | 2     | y                       | y   | y   | y    | 4     | y                  |     |     | y    | 2     |
| 67   | y                  |     |     |      | 1     | y                       | y   | y   |      | 3     | y                  | y   | y   | y    | 4     |
| 68   |                    |     |     |      | 0     | y                       |     |     |      | 1     |                    |     |     |      | 0     |
| 69   | y                  |     |     |      | 1     | y                       |     |     |      | 1     | y                  |     |     | y    | 2     |
| 70   |                    |     |     |      | 0     | y                       | y   | y   | y    | 4     | y                  | y   | y   | y    | 4     |
| 72   |                    |     |     |      | 0     |                         |     | y   |      | 1     | y                  |     |     |      | 1     |
| 73   | y                  |     | y   | y    | 3     | y                       | y   | y   | y    | 4     | y                  | y   | y   | y    | 4     |
| 74   | y                  |     | y   |      | 2     | y                       | y   | y   | y    | 4     |                    |     |     |      | 0     |
| 76   | y                  |     |     |      | 1     |                         |     | y   |      | 1     |                    |     |     |      | 0     |
| 77   | y                  |     |     |      | 1     | y                       |     | y   |      | 2     |                    |     |     |      | 0     |
| 81   | y                  |     | y   | y    | 3     | y                       | y   | y   | y    | 4     | y                  | y   | y   | y    | 4     |
| 83   |                    |     |     |      | 0     | y                       |     |     |      | 1     |                    |     |     |      | 0     |
| 85   |                    |     |     |      | 0     |                         |     | y   |      | 1     |                    |     |     |      | 0     |
| 94   | y                  |     |     | y    | 2     |                         |     |     |      | 0     | y                  |     |     | y    | 2     |
| 95   | y                  |     |     |      | 1     | y                       | y   | y   | y    | 4     | y                  |     |     | y    | 2     |
| 97   | y                  |     |     |      | 1     | y                       | y   | y   | y    | 4     | y                  |     | y   | y    | 3     |
| 99   | y                  |     |     |      | 1     | y                       |     | y   | y    | 3     | y                  |     |     | y    | 2     |
| 114  | y                  |     |     |      | 1     | y                       |     | y   | y    | 3     | y                  |     | y   | y    | 3     |
| 116  | y                  |     |     |      | 1     | y                       | y   | y   | y    | 4     | y                  |     |     |      | 1     |
| 117  | y                  |     |     |      | 1     |                         |     |     |      | 0     | y                  | y   | y   | y    | 4     |
| 123  |                    |     |     |      | 0     | y                       |     |     |      | 1     |                    |     |     |      | 0     |
| 124  | y                  |     | y   |      | 2     |                         |     |     |      | 0     | y                  |     |     |      | 1     |
| 125  |                    |     |     |      | 0     |                         | y   | y   | y    | 3     |                    |     |     |      | 0     |
| 129  |                    |     |     |      | 0     | y                       |     |     |      | 1     |                    |     |     |      | 0     |
| 132  | y                  |     |     |      | 1     |                         |     |     |      | 0     | y                  |     |     |      | 1     |
| 133  | y                  |     |     |      | 1     |                         |     | y   |      | 1     | y                  | y   |     |      | 2     |
| 134  |                    |     |     |      | 0     | y                       |     |     |      | 1     |                    |     |     |      | 0     |
| 135  | y                  |     | y   |      | 2     | y                       |     | y   | y    | 3     | y                  |     |     |      | 1     |
| 145  | y                  |     |     |      | 1     | y                       | y   | y   | y    | 4     |                    |     | y   |      | 1     |
| 149  |                    |     |     |      | 0     |                         |     |     |      | 0     | y                  |     |     | y    | 2     |
| 154  | y                  |     |     |      | 1     | y                       |     | y   |      | 2     | y                  | y   | y   | y    | 4     |
| 156  | y                  |     | y   |      | 2     | y                       | y   | y   | y    | 4     | y                  | y   | y   | y    | 4     |
| 159  | y                  |     |     |      | 1     |                         |     |     |      | 0     |                    |     |     |      | 0     |
| 160  | y                  |     | y   |      | 2     | y                       | y   | y   | y    | 4     | y                  |     | y   |      | 2     |
| 164  | y                  |     |     |      | 1     |                         | y   | y   | y    | 3     | y                  | y   | y   | y    | 4     |
| 165  | y                  |     |     |      | 1     |                         |     |     |      | 0     |                    |     |     |      | 0     |
| 167  | y                  |     |     | y    | 2     | y                       |     | y   | y    | 3     | y                  |     | y   | y    | 3     |
| 169  | y                  |     |     |      | 1     |                         |     |     |      | 0     | y                  |     |     |      | 1     |
| 171  | y                  |     |     |      | 1     | y                       |     |     |      | 1     | y                  |     |     | y    | 2     |
| 175  | y                  |     | y   |      | 2     |                         |     | y   |      | 0     | y                  |     |     |      | 1     |
| 177  | y                  |     |     |      | 1     |                         |     | y   | y    | 2     | y                  |     |     |      | 1     |
| 185  | y                  |     |     |      | 1     |                         |     | y   |      | 1     |                    |     |     |      | 0     |
| 188  | y                  |     |     |      | 1     |                         |     | y   |      | 1     | y                  |     |     |      | 1     |
| 192  | y                  |     |     |      | 1     |                         |     |     |      | 0     |                    |     |     |      | 0     |
| 203  | y                  |     |     |      | 1     |                         |     |     |      | 0     | y                  |     |     |      | 1     |
| 226  | y                  |     |     |      | 1     |                         |     |     |      | 0     |                    |     |     |      | 0     |
| 237  | y                  |     |     |      | 1     |                         |     |     |      | 0     | y                  |     |     |      | 1     |
| 255  |                    |     |     |      | 0     | y                       |     | y   | y    | 3     | y                  |     |     | y    | 2     |
| 258  |                    |     |     |      | 0     |                         |     | y   |      | 1     | y                  | y   | y   | y    | 4     |
| 260  | y                  |     |     |      | 1     | y                       |     |     |      | 1     | y                  |     |     |      | 1     |
| 266  | y                  |     |     |      | 1     |                         |     |     |      | 0     |                    |     |     |      | 0     |
| SUM  | 50                 | 2   | 15  | 6    | 18    | 33                      | 21  | 37  | 25   | 30    | 45                 | 12  | 19  | 25   | 28    |

D. Codon-based z-tests for selection (neutrality, purifying and positive selection) for each domain and globally in MHC class I; results presented as Z-statistic (p-value), Z-statistics with significant values ( $p < 0.05$ ) are in bold; positive selection was also tested using PARRIS implemented in the Datamonkey webserver, with results presented as [p-value].

| Species                 | Neutrality                   |                              |                         |                              |                          | Purifying         |                   |                   |                       |                         | Positive                                     |                                         |                                         |                                              |                               |
|-------------------------|------------------------------|------------------------------|-------------------------|------------------------------|--------------------------|-------------------|-------------------|-------------------|-----------------------|-------------------------|----------------------------------------------|-----------------------------------------|-----------------------------------------|----------------------------------------------|-------------------------------|
|                         | Overall                      | $\alpha 1$                   | $\alpha 2$              | $\alpha 1 + \alpha 2$        | $\alpha 3$               | Overall           | $\alpha 1$        | $\alpha 2$        | $\alpha 1 + \alpha 2$ | $\alpha 3$              | Overall                                      | $\alpha 1$                              | $\alpha 2$                              | $\alpha 1 + \alpha 2$                        | $\alpha 3$                    |
| <i>R. japonica</i>      | <b>4.030</b><br>( $<0.001$ ) | <b>3.536</b><br>( $<0.001$ ) | <b>2.472</b><br>(0.015) | <b>4.199</b><br>( $<0.001$ ) | 0.042<br>(0.966)         | -3.959<br>(1.000) | -3.503<br>(1.000) | -2.497<br>(1.000) | -4.204<br>(1.000)     | -0.043<br>(1.000)       | <b>4.024</b><br>( $<0.001$ )<br>[ $<0.001$ ] | <b>3.493</b><br>( $<0.001$ )<br>[0.001] | <b>2.449</b><br>(0.008)<br>[0.145]      | <b>4.219</b><br>( $<0.001$ )<br>[ $<0.001$ ] | 0.0431<br>(0.4828)<br>[0.922] |
| <i>R. ornativentris</i> | <b>2.031</b><br>(0.044)      | <b>2.808</b><br>(0.006)      | <b>2.010</b><br>(0.047) | <b>3.446</b><br>(0.001)      | <b>-2.290</b><br>(0.024) | -1.961<br>(1.000) | -1.991<br>(1.000) | -2.809<br>(1.000) | -3.422<br>(1.000)     | <b>2.335</b><br>(0.011) | <b>1.950</b><br>(0.027)<br>[ $<0.001$ ]      | <b>2.880</b><br>(0.002)<br>[ $<0.001$ ] | <b>1.960</b><br>(0.026)<br>[ $<0.001$ ] | <b>3.372</b><br>(0.001)<br>[ $<0.001$ ]      | -2.373<br>(1.000)<br>[1.000]  |
| <i>R. t. tagoi</i>      | <b>3.186</b><br>(0.002)      | <b>2.057</b><br>(0.042)      | <b>3.443</b><br>(0.001) | <b>3.808</b><br>( $<0.001$ ) | -1.097<br>(0.275)        | -3.198<br>(1.000) | -2.057<br>(1.000) | -3.443<br>(1.000) | -3.808<br>(1.000)     | 1.106<br>(0.135)        | <b>3.176</b><br>(0.001)<br>[ $<0.001$ ]      | <b>2.057</b><br>(0.021)<br>[0.006]      | <b>3.363</b><br>(0.001)<br>[ $<0.001$ ] | <b>3.920</b><br>( $<0.001$ )<br>[ $<0.001$ ] | -1.128<br>(1.000)<br>[1.000]  |
